# Supplementary material for: Drug-resistant cancer cell-derived exosomal EphA2 promotes breast cancer metastasis via the EphA2-Ephrin A1 reverse signaling
Source: Research Square preprint supplement (doi:10.21203/rs.3.rs-103652/v1), 2020-11-12
Supplement: Supplementary file 1 [file df3c4f030d2de54cc0b0379d.docx]

Supplementary Table 1 siRNA sequences used in this study

| Name | Sequence |
| --- | --- |
| shEphA2 #1 | 5′-CTATTCTGTCAGTGTTAAA-3′ |
| shEphA2 #2 | 5′-GATAAGTTTCTATTCTGTCAG-3′ |
| shRab27a #1 | 5′-GCTGCCAATGGGACAAACATA-3′ |
| shRab27a #2 | 5′-CAGGAGAGGTTTCGTAGCTA-3′ |
| shEphrin-A1 #1 | 5′-AGAGGTGCGG GTTCTACATAG-3′ |
| shEphrin-A1 #2 | 5′-GTCTTCTGGAACAGTTCAAAT-3′ |
| shEphrin-A1 #3 | 5′-ATGCCACACCTGGCCTTAAAG-3′ |
